# Supplementary material
Source: MDPI journal article supplement (https://www.mdpi.com/2076-3417/13/20/11184)
Supplement: s1 [file s1]

## Supplementary Information

**Table S1:** Primer sequences used in this study

| Gene      | Sequence (5'-3')              |
|-----------|-------------------------------|
| ITS2      | F-ATGCGATACTTGGTGTGAAT        |
|           | R-GACGCTTCTCCAGACTACAAT       |
| matK      | F-CGTACAGTACTTTTGTGTTTACGAG   |
|           | R-ACCCAGTCCATCTGGAAATCTTGGTTC |
| psbA-trnH | F-GTTATGCATGAACGTAATGCTC      |
|           | R-CGCGCATGGTGGATTCAACAATCC    |

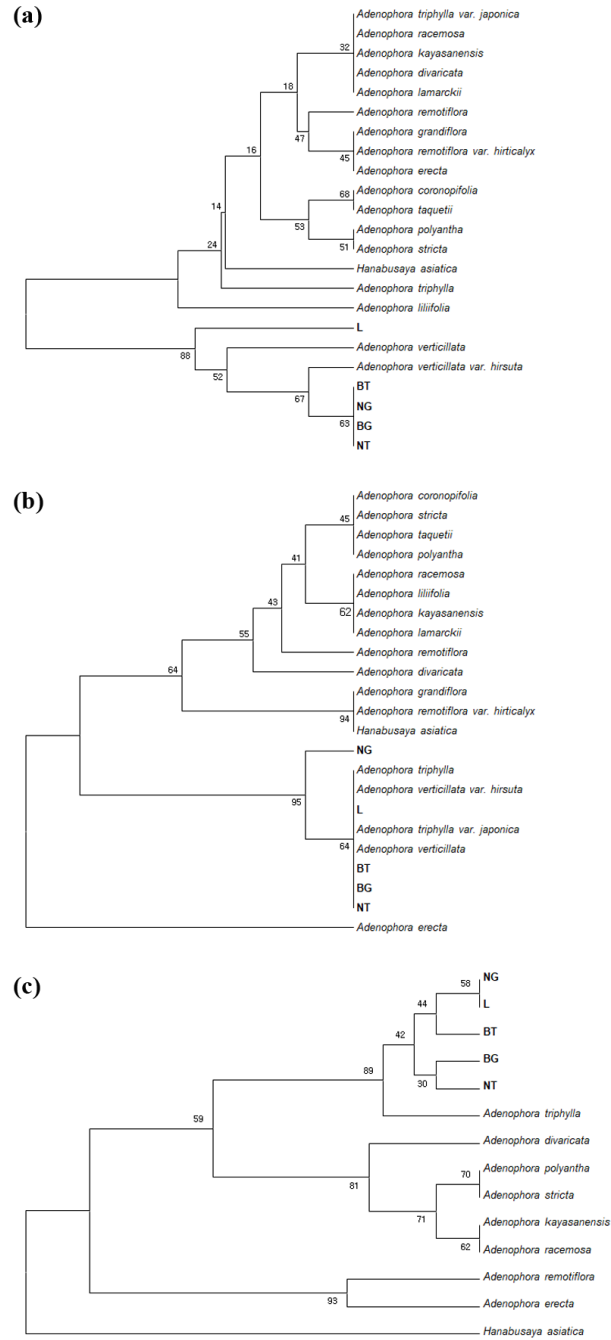

Figure S1. Phylogenetic analyses of *A. triphylla* genotypes based on the nucleotide sequences of ITS2 region (a), matK region (b), and psbA-trnH region (c).
